# Supplementary material for: Progression of Diabetic Kidney Disease and Gastrointestinal Symptoms in Patients with Type I Diabetes
Source: MDPI journal article supplement (doi:10.3390/biomedicines11102679), 2023-09-29
Supplement: s1 [file s1]

## Supplement S3

**Table S1.** Histopathology findings of upper endoscopy in the study groups.

|                               | <b>Stable diabetic kidney disease, N=17</b> | <b>Progressive diabetic kidney disease, N=4</b> |
|-------------------------------|---------------------------------------------|-------------------------------------------------|
| Hyperaemic gastropathy        | 4                                           | 0                                               |
| Hyperaemic duodenopathy       | 1                                           | 0                                               |
| Oesophageal candidiasis       | 1                                           | 0                                               |
| Gastric intestinal metaplasia | 3                                           | 0                                               |
| Active gastritis              | 1                                           | 1                                               |
| Chronic atrophic gastritis    | 1                                           | 2                                               |

**Table S2.** Histopathology findings of lower endoscopy in the study groups.

|                                         | <b>Stable diabetic kidney disease, N=17</b> | <b>Progressive diabetic kidney disease, N=4</b> |
|-----------------------------------------|---------------------------------------------|-------------------------------------------------|
| Polyps                                  | 1                                           | 1                                               |
| Diverticulosis                          | 1                                           | 0                                               |
| Erosion of sigmoid colon                | 1                                           | 0                                               |
| Perianal papilloma                      | 1                                           | 0                                               |
| Eosinophilic infiltration               | 7                                           | 1                                               |
| Lymphoid follicles/ lymphoid aggregates | 6                                           | 1                                               |
| Lymphoplasmacytic infiltration          | 4                                           | 1                                               |
| Lymphocyte and macrophage infiltration  | 3                                           | 0                                               |
| Stromal fibrosis                        | 3                                           | 0                                               |
| Mononuclear cell infiltration           | 2                                           | 0                                               |
| Tubular adenomas                        | 1                                           | 1                                               |
| Active inflammation                     | 5                                           | 1                                               |
| Active colitis                          | 1                                           | 0                                               |
