# Supplementary material for: Progression of Diabetic Kidney Disease and Gastrointestinal Symptoms in Patients with Type I Diabetes
Source: MDPI journal article supplement (doi:10.3390/biomedicines11102679), 2023-09-29
Supplement: s1 [file s1]

Supplement S1

**14. In the last two months, how often have you had pain or discomfort in your stomach?**

1. Not at all; go to question 16.
2. Sometimes; less than one quarter of the time
3. Often; more than one quarter of the time
4. Very often; more than half of the time
5. Almost always; more than three quarters of the time

**15. In the last two months, how severe has this pain or discomfort in your stomach usually been?**

1. Very mild; can usually be ignored
2. Mild; can be ignored if I don't think about it
3. Moderate; cannot be ignored, but does not affect my lifestyle
4. Severe; affects my lifestyle
5. Very Severe; affects my lifestyle a great deal

**16. In the last two months, how often have you lost your appetite (did not feel hungry)?**

1. Not at all
2. Sometimes; less than one quarter of the time
3. Often; more than one quarter of the time
4. Very often; more than half of the time
5. Almost always; more than three quarters of the time

**17. In the last two months, how often have you had heartburn (a burning pain or discomfort that rises up behind the breastbone to your throat)?**

1. Not at all
2. Sometimes; less than one quarter of the time
3. Often; more than one quarter of the time
4. Very often; more than half of the time
5. Almost always; more than three quarters of the time

**18. In the last two months, how often have you had bitter or sour tasting fluid that comes up into your throat or mouth?**

1. Not at all
2. Sometimes; less than one quarter of the time
3. Often; more than one quarter of the time
4. Very often; more than half of the time
5. Almost always; more than three quarters of the time

**19. In the last two months, how often have you had a feeling of abdominal fullness or bloating?**

1. Not at all
2. Sometimes; less than one quarter of the time
3. Often; more than one quarter of the time
4. Very often; more than half of the time
5. Almost always; more than three quarters of the time

**20. In the last two months, how often have you had difficulty swallowing food or liquids (ie. you have noticed food or drink sticking or not passing down properly)?**

1. Not at all
2. Sometimes; less than one quarter of the time
3. Often; more than one quarter of the time
4. Very often; more than half of the time
5. Almost always; more than three quarters of the time

**21. In the last two months, how often have you felt uncomfortably full soon after starting to eat, so you could not finish your normal meal?**

1. Not at all
2. Sometimes; less than one quarter of the time
3. Often; more than one quarter of the time
4. Very often; more than half of the time
5. Almost always; more than three quarters of the time

**22. In the last two months, how often have you had an unpleasant feeling of food staying in your stomach after normal meals?**

1. Not at all
2. Sometimes; less than one quarter of the time
3. Often; more than one quarter of the time
4. Very often; more than half of the time
5. Almost always; more than three quarters of the time

**23. In the last two months, how often have you felt nauseated (you felt like vomiting but didn't)?**

1. Not at all
2. Sometimes; less than one quarter of the time
3. Often; more than one quarter of the time
4. Very often; more than half of the time
5. Almost always; more than three quarters of the time

**24. In the last two months, how often have you vomited?**

1. Not at all
2. Sometimes; less than one quarter of the time
3. Often; more than one quarter of the time
4. Very often; more than half of the time
5. Almost always; more than three quarters of the time

**26. In the last two months, how would you describe your usual bowel pattern? (*Tick one answer*)**

1. Normal
2. Constipated
3. Diarrhoea
4. Alternating constipation and diarrhoea

***If to question no. 26 you answer - Normally, you can not answer the following questions. Thank you for your responsiveness and careful filling of the questionnaire!***

**27. In the last two months, how often have you had more than three bowel motions a day?**

1. Not at all
2. Sometimes; less than one quarter of the time
3. Often; more than one quarter of the time
4. Very often; more than half of the time
5. Almost always; more than three quarters of the time

**28. In the last two months, how often have your bowel motions been loose or watery?**

1. Not at all
2. Sometimes; less than one quarter of the time
3. Often; more than one quarter of the time
4. Very often; more than half of the time
5. Almost always; more than three quarters of the time

**29. In the last two months, how often have you lost control with leakage of bowel movements (accidents)?**

1. Never;
2. About once a month or less
3. Two or three times a month
4. About once a week
5. Several times a week
6. Daily

**30. In the last two months, how often have you had less than three bowel motions a week?**

1. Not at all
2. Sometimes; less than one quarter of the time
3. Often; more than one quarter of the time
4. Very often; more than half of the time
5. Almost always; more than three quarters of the time

**31. In the last two months, how often have your bowel motions been very hard or difficult to pass?**

1. Not at all
2. Sometimes; less than one quarter of the time
3. Often; more than one quarter of the time
4. Very often; more than half of the time
5. Almost always; more than three quarters of the time

**32. In the last two months, how often have you felt that there was still bowel motion that needed to be passed after finishing a bowel motion?**

1. Not at all
2. Sometimes; less than one quarter of the time
3. Often; more than one quarter of the time
4. Very often; more than half of the time
5. Almost always; more than three quarters of the time
